# Supplementary material
Source: Frontiers journal article supplement (https://www.frontiersin.org/articles/486732)
Supplement: Data_Sheet_4.PDF [file Data_Sheet_4.PDF]

## *Supplementary Material 4*

### 1    **pH of BHI medium before and after cultivation of *F. tularensis* subsp. *holarctica* strain FSC200**

| <b>pH of the medium<br/>before cultivation <sup>a</sup></b> | <b>pH after 16 / 40 h of<br/>cultivation <sup>b</sup></b> |
|-------------------------------------------------------------|-----------------------------------------------------------|
| 7.4                                                         | ~7.5                                                      |
| 6.8                                                         | ~7.5                                                      |
| 6.3                                                         | ~7.0                                                      |
| 5.8                                                         | ~7.0                                                      |
| 5.3                                                         | ~6.0 (16 h) / ~7.0 (40 h)                                 |
| 4.8                                                         | ~5.0                                                      |
| 4.3                                                         | ~4.5                                                      |

<sup>a</sup> pH of BHI medium was adjusted with HCl.

<sup>b</sup> pH of the culture media after cultivation was checked using pH indicator strips (range 2.0–9.0, Macherey-Nagel, #92118) with accuracy of 0.5.
