# Supplementary material
Source: Frontiers journal article supplement (https://www.frontiersin.org/articles/486732)
Supplement: Data_Sheet_6.PDF [file Data_Sheet_6.PDF]

## Supplementary Material 6

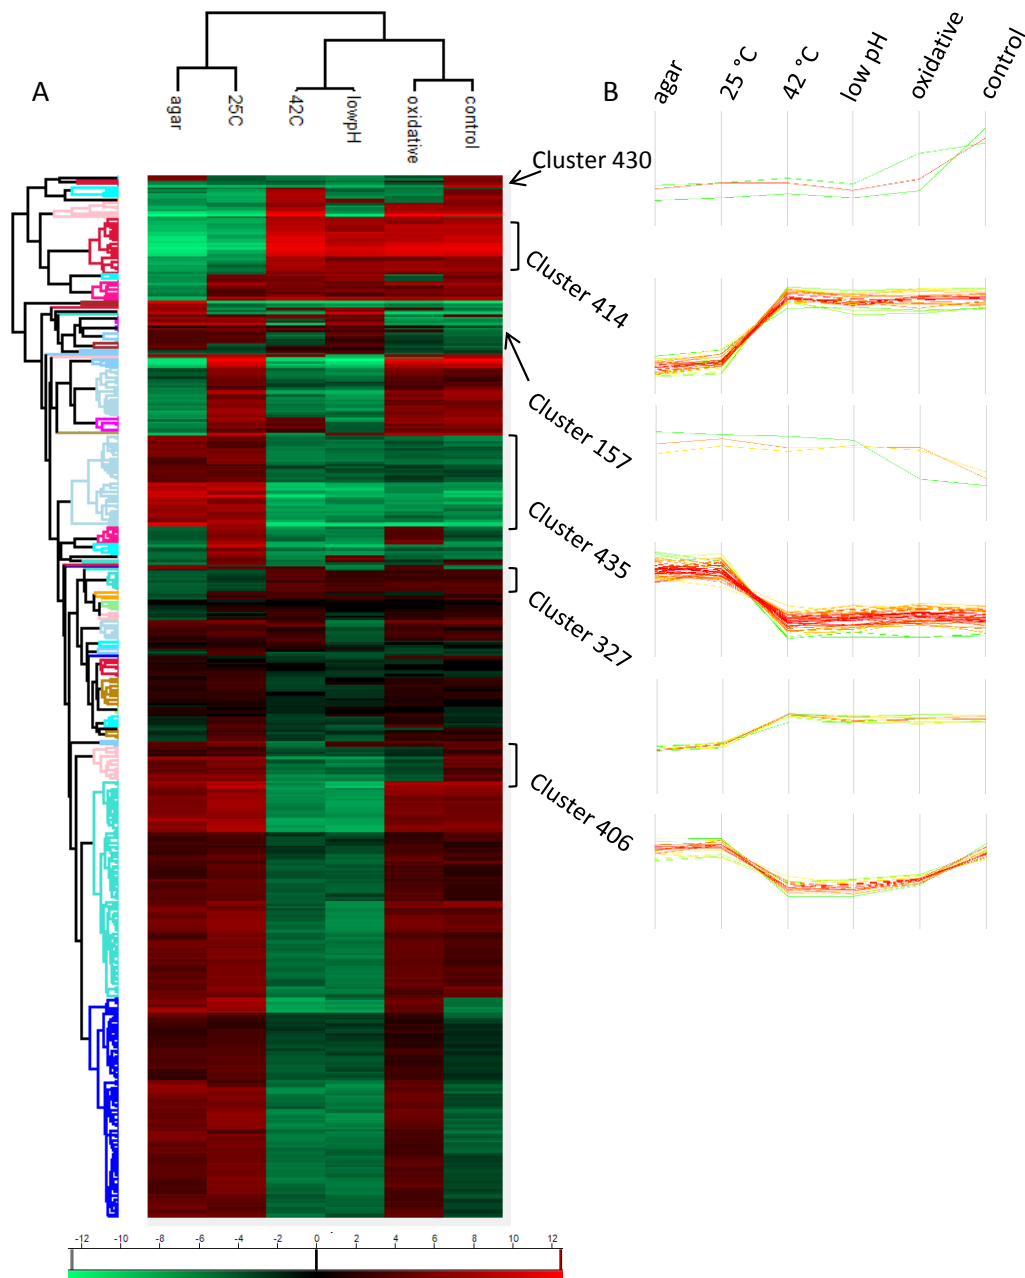

**Supplementary Figure 6-1.** (A) Hierarchical clustering of proteins with ANOVA-significantly different abundance in samples from different cultivation conditions. High and low abundances are shown in red and green, respectively. Clusters of proteins that are discussed in the text and listed in **Supplementary Table 6-1** are highlighted. (B) Profile plots of these clusters showing distinct behavior with respect to the cultivation conditions.

**Supplementary Table 6-1.** Protein clusters from the relative proteomic comparison of OMV isolated from six different cultivation conditions as depicted in **Supplementary Figure 6-1**. Hierarchical clustering was applied on all ANOVA-significant proteins. Enrichment factors and *p*-values of the enrichment were calculated by Fisher's exact test.

| <b>Cluster 435</b>  |                                                                               |          |       |
|---------------------|-------------------------------------------------------------------------------|----------|-------|
| <b>enriched in:</b> | cytoplasmic localization ( $p = 8.7\text{E-}05$ , enrichment = 1.6)           |          |       |
| AFT93298.1          | cell division protein                                                         | FTS_1660 | ftsK  |
| AFT92714.1          | DNA/RNA endonuclease G                                                        | FTS_0869 |       |
| AFT93196.1          | succinyl-CoA synthetase subunit beta                                          | FTS_1517 | sucC  |
| AFT92111.1          | chaperone clpB                                                                | FTS_0084 | clpB  |
| AFT92542.1          | hypothetical protein FTS_0655                                                 | FTS_0655 |       |
| AFT92486.1          | long chain fatty acid CoA ligase                                              | FTS_0585 | fadD  |
| AFT93174.1          | phosphopyruvate hydratase                                                     | FTS_1491 | eno   |
| AFT92917.1          | hypothetical protein FTS_1134                                                 | FTS_1134 |       |
| AFT92129.1          | hypothetical protein FTS_0106                                                 | FTS_0106 |       |
| AFT92484.1          | fusion product of 3-hydroxacyl-CoA dehydrogenase and acyl-CoA-binding protein | FTS_0583 | fadB  |
| AFT92731.1          | host factor I for bacteriophage Q beta replication                            | FTS_0889 | hfq   |
| AFT92761.1          | ribose-phosphate pyrophosphokinase                                            | FTS_0930 | prsA  |
| AFT93367.1          | glutaredoxin-related protein                                                  | FTS_1748 |       |
| AFT92806.1          | AhpC/TSA family protein                                                       | FTS_0990 |       |
| AFT92911.1          | intracellular growth locus protein D                                          | FTS_1128 | iglD2 |
| AFT92123.1          | intracellular growth locus protein D                                          | FTS_0100 | iglD1 |
| AFT92905.1          | pyruvate kinase                                                               | FTS_1119 | pyk   |
| AFT93128.1          | purine nucleoside phosphorylase                                               | FTS_1432 | deoD  |
| AFT93190.1          | pyridoxal biosynthesis lyase PdxS                                             | FTS_1510 |       |
| AFT93451.1          | cell division protein FtsA                                                    | FTS_1858 | ftsA  |
| AFT93396.1          | NADH dehydrogenase subunit G                                                  | FTS_1781 | nuoG  |
| AFT92397.1          | BNR/Asp-box repeat-containing protein                                         | FTS_0466 |       |
| AFT92509.1          | thioredoxin                                                                   | FTS_0610 | trx1  |
| AFT92815.1          | 50S ribosomal protein L9                                                      | FTS_1002 | rplI  |
| AFT92937.1          | 30S ribosomal protein S9                                                      | FTS_1162 | rpsI  |
| AFT92456.1          | UDP-N-acetylglucosamine acyltransferase                                       | FTS_0541 | lpxA  |
| AFT93359.1          | succinate dehydrogenase iron-sulfur subunit                                   | FTS_1740 | sdhB  |
| AFT92501.1          | WbtJ protein                                                                  | FTS_0601 | wbtJ  |
| AFT93305.1          | chaperonin GroEL                                                              | FTS_1670 | groEL |
| AFT93339.1          | elongation factor Tu                                                          | FTS_1709 | tufA  |
| AFT93306.1          | co-chaperonin GroES                                                           | FTS_1671 | groES |
| AFT92942.1          | molecular chaperone DnaK                                                      | FTS_1167 | dnaK  |
| AFT92466.1          | signal peptidase I                                                            | FTS_0554 | lepB  |
| AFT93455.1          | 30S ribosomal protein S1                                                      | FTS_1862 | rpsA  |
| AFT92483.1          | acetyl-CoA acetyltransferase                                                  | FTS_0582 | fadA  |
| AFT92960.1          | hypothetical protein FTS_1195                                                 | FTS_1195 |       |

|            |                                     |          |       |
|------------|-------------------------------------|----------|-------|
| AFT93007.1 | hypothetical protein FTS_1258       | FTS_1258 |       |
| AFT93450.1 | cell division protein FtsZ          | FTS_1857 | ftsZ  |
| AFT92159.1 | universal stress protein            | FTS_0161 | uspA  |
| AFT92895.1 | acyl carrier protein                | FTS_1109 | acpP  |
| AFT92222.1 | 30S ribosomal protein S10           | FTS_0232 | rpsJ  |
| AFT92513.1 | bacterioferritin                    | FTS_0617 | bfr   |
| AFT92077.1 | HlyD family membrane fusion protein | FTS_0036 | emrA2 |

#### Cluster 414

|                     |                                                                 |          |      |
|---------------------|-----------------------------------------------------------------|----------|------|
| <b>enriched in:</b> | OMV-associated ( $p = 1.2\text{E-}19$ , enrichment = 5.1)       |          |      |
|                     | unknown localization ( $p = 5.8\text{E-}10$ , enrichment = 3.8) |          |      |
|                     | periplasmic localization ( $p = 0.0022$ , enrichment = 6.2)     |          |      |
| AFT92267.1          | hypothetical protein FTS_0282                                   | FTS_0282 |      |
| AFT92666.1          | hypothetical protein FTS_0814                                   | FTS_0814 |      |
| AFT92476.1          | hypothetical protein FTS_0571                                   | FTS_0571 |      |
| AFT92632.1          | gamma-glutamyltranspeptidase                                    | FTS_0764 | ggt  |
| AFT93208.1          | hypothetical protein FTS_1538                                   | FTS_1538 |      |
| AFT92433.1          | membrane protein of unknown function                            | FTS_0515 | ttg2 |
| AFT92161.1          | hypothetical protein FTS_0163                                   | FTS_0163 |      |
| AFT92965.1          | hypothetical protein FTS_1201                                   | FTS_1201 |      |
| AFT92326.1          | methionine sulfoxide reductase B                                | FTS_0370 | msrB |
| AFT92351.1          | hypothetical protein FTS_0402                                   | FTS_0402 |      |
| AFT93368.1          | hypothetical protein FTS_1749                                   | FTS_1749 |      |
| AFT92715.1          | beta-lactamase class A                                          | FTS_0870 | bla  |
| AFT92980.1          | hypothetical protein FTS_1221                                   | FTS_1221 |      |
| AFT93177.1          | hypothetical protein FTS_1495                                   | FTS_1495 |      |
| AFT92198.1          | pyrrolidone carboxylate peptidase                               | FTS_0203 | pcp  |
| AFT92477.1          | hypothetical protein FTS_0572                                   | FTS_0572 |      |
| AFT92421.1          | hypothetical protein FTS_0495                                   | FTS_0495 |      |
| AFT93352.1          | hypothetical protein FTS_1731                                   | FTS_1731 |      |
| AFT93439.1          | hypothetical protein FTS_1845                                   | FTS_1845 |      |
| AFT92071.1          | histidine acid phosphatase                                      | FTS_0029 |      |
| AFT93014.1          | hypothetical protein FTS_1270                                   | FTS_1270 |      |
| AFT93160.1          | peroxidase/catalase                                             | FTS_1471 | katG |
| AFT92167.1          | hypothetical protein FTS_0170                                   | FTS_0170 |      |
| AFT93152.1          | hypothetical protein FTS_1462                                   | FTS_1462 |      |
| AFT92056.1          | outer membrane protein of unknown function                      | FTS_0008 |      |

#### Cluster 327

|                     |                                                           |          |      |
|---------------------|-----------------------------------------------------------|----------|------|
| <b>enriched in:</b> | OMV-associated ( $p = 3.2\text{E-}07$ , enrichment = 5.1) |          |      |
| AFT93482.1          | peptide methionine sulfoxide reductase                    | FTS_1906 | msrA |
| AFT93261.1          | hypothetical protein FTS_1607                             | FTS_1607 |      |
| AFT92281.1          | hypothetical protein FTS_0297                             | FTS_0297 |      |
| AFT92667.1          | hypothetical protein FTS_0815                             | FTS_0815 |      |
| AFT92453.1          | outer membrane protein OmpH                               | FTS_0538 | ompH |

|            |                                         |          |       |
|------------|-----------------------------------------|----------|-------|
| AFT93168.1 | chitinase family 18 protein             | FTS_1485 |       |
| AFT93387.1 | uroporphyrinogen decarboxylase          | FTS_1769 | hemE  |
| AFT92110.1 | chitinase                               | FTS_0083 | chiB  |
| AFT93224.1 | organic solvent tolerance protein, OstA | FTS_1557 | ostA1 |

**Cluster 406**

**enriched in:** RNA polymerase ( $p = 6.98\text{E-}07$ , enrichment = 31.1)  
Pyrimidine metabolism ( $p = 0.0001$ , enrichment = 12.5)  
Purine metabolism ( $p = 0.0005$ , enrichment = 8.9)  
GO:0006807 Nitrogen compound metabolism ( $p = 5.9\text{E-}05$ , enrichment = 3.4)

|            |                                                                                     |          |       |
|------------|-------------------------------------------------------------------------------------|----------|-------|
| AFT92923.1 | PdpA protein                                                                        | FTS_1141 | pdpA2 |
| AFT92135.1 | PdpA protein                                                                        | FTS_0113 | pdpA1 |
| AFT93442.1 | glutamine synthetase                                                                | FTS_1848 | glnA  |
| AFT92331.1 | aspartate aminotransferase                                                          | FTS_0376 | aspC1 |
| AFT93090.1 | undecaprenyldiphospho-muramoylpentapeptide<br>beta-N- acetylglucosaminyltransferase | FTS_1379 | murG  |
| AFT92219.1 | 30S ribosomal protein S12                                                           | FTS_0229 | rpsL  |
| AFT92919.1 | hypothetical protein FTS_1137                                                       | FTS_1137 |       |
| AFT92131.1 | hypothetical protein FTS_0109                                                       | FTS_0109 |       |
| AFT93357.1 | 2-oxoglutarate dehydrogenase complex, E2<br>component, dihydrolipoyltranssuccinase  | FTS_1738 | sucB  |
| AFT92851.1 | 1-deoxy-D-xylulose-5-phosphate synthase                                             | FTS_1045 | dxs   |
| AFT93075.1 | DEAD-box subfamily ATP-dependent helicase                                           | FTS_1360 | deaD  |
| AFT93332.1 | DNA-directed RNA polymerase subunit beta                                            | FTS_1701 | rpoB  |
| AFT92660.1 | P-pantothenate cysteine ligase/P-<br>pantothenoylcysteine decarboxylase             | FTS_0801 | dfp   |
| AFT93331.1 | DNA-directed RNA polymerase, beta' subunit                                          | FTS_1700 | rpoC  |
| AFT92248.1 | DNA-directed RNA polymerase subunit alpha                                           | FTS_0258 | rpoA  |
| AFT93333.1 | 50S ribosomal protein L7/L12                                                        | FTS_1702 | rplL  |
| AFT92511.1 | DNA-directed RNA polymerase subunit alpha                                           | FTS_0614 | rpoA2 |

**Cluster 157**

|            |                                                       |          |      |
|------------|-------------------------------------------------------|----------|------|
| AFT93475.1 | putative ABC transporter ATP-binding protein          | FTS_1893 |      |
| AFT92488.1 | isocitrate dehydrogenase                              | FTS_0587 | icd  |
| AFT93218.1 | acetyl-CoA carboxylase, biotin carboxylase<br>subunit | FTS_1551 | accC |

**Cluster 430**

|            |                                      |          |        |
|------------|--------------------------------------|----------|--------|
| AFT92910.1 | intracellular growth locus protein C | FTS_1127 | iglC2  |
| AFT92122.1 | intracellular growth locus protein C | FTS_0099 | iglC1  |
| AFT92918.1 | hypothetical protein FTS_1135        | FTS_1135 | (iglG) |
| AFT92130.1 | hypothetical protein FTS_0107        | FTS_0107 |        |
| AFT93438.1 | hypothetical protein FTS_1842        | FTS_1842 |        |
| AFT93029.1 | hypothetical protein FTS_1289        | FTS_1289 |        |
| AFT92250.1 | hypothetical protein FTS_0261        | FTS_0261 |        |

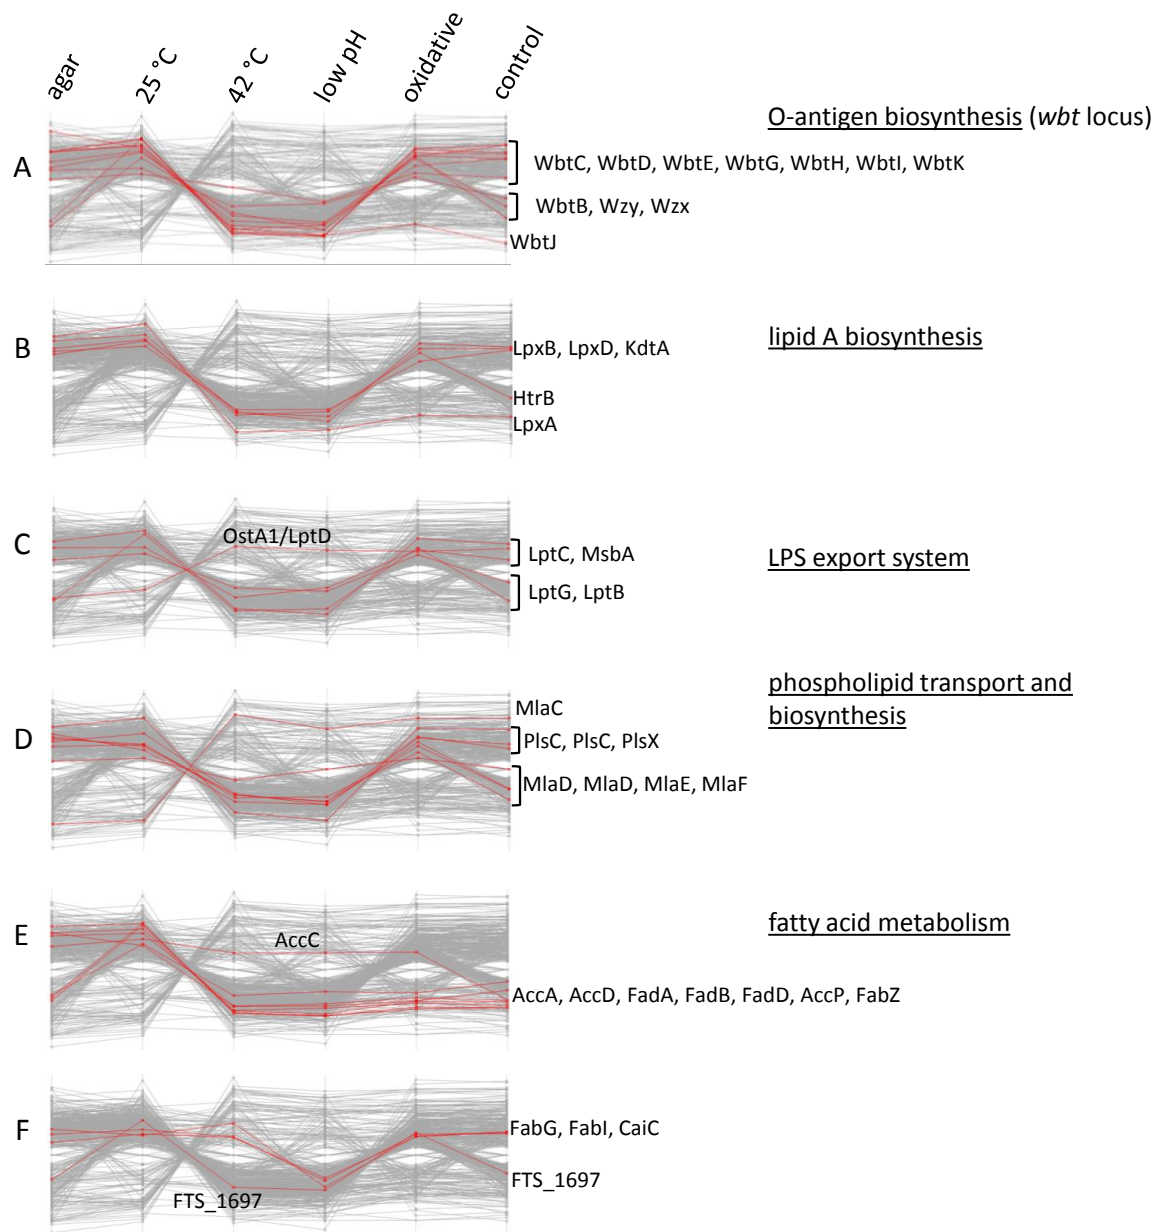

**Supplementary Figure 6-2.** Profile plots of selected biosynthetic pathways discussed in the text and listed in **Supplementary Table 6-2** on the background of all ANOVA-significant proteins.

**Supplementary Table 6-2.** List of proteins from biosynthetic pathways of LPS, phospholipids, and fatty acids depicted in **Supplementary Fig. 6-2**.

|                                                  |                                                            |          |              |
|--------------------------------------------------|------------------------------------------------------------|----------|--------------|
| <b>O-antigen biosynthesis (<i>wbt</i> locus)</b> |                                                            |          |              |
| AFT92492.1                                       | galactosyl transferase                                     | FTS_0592 | wbtB         |
| AFT92493.1                                       | UDP-glucose 4-epimerase                                    | FTS_0593 | wbtC         |
| AFT92494.1                                       | galacturonosyl transferase                                 | FTS_0594 | (wbtD)       |
| AFT92495.1                                       | UDP-glucose/GDP-mannose dehydrogenase                      | FTS_0595 | wbtE         |
| AFT92497.1                                       | membrane protein/O-antigen protein                         | FTS_0597 | wzy          |
| AFT92498.1                                       | hypothetical protein FTS_0598                              | FTS_0598 | (wbtG)       |
| AFT92499.1                                       | glutamine amidotransferase/asparagine synthase             | FTS_0599 | wbtH         |
| AFT92500.1                                       | sugar transamine/perosamine synthetase                     | FTS_0600 | wbtI         |
| AFT92501.1                                       | WbtJ protein                                               | FTS_0601 | wbtJ         |
| AFT92502.1                                       | O-antigen flippase                                         | FTS_0602 | (wzx)        |
| AFT92503.1                                       | glycosyltransferase                                        | FTS_0603 | wbtK         |
| <b>Lipid A biosynthesis</b>                      |                                                            |          |              |
| AFT92456.1                                       | UDP-N-acetylglucosamine acyltransferase                    | FTS_0541 | lpxA         |
| AFT92457.1                                       | lipid-A-disaccharide synthase                              | FTS_0542 | lpxB         |
| AFT92454.1                                       | UDP-3-O-[3-hydroxymyristoyl] glucosamine N-acyltransferase | FTS_0539 | lpxD         |
| AFT92462.1                                       | 3-deoxy-D-manno-octulosonic-acid transferase               | FTS_0549 | kdtA         |
| AFT92173.1                                       | LPS fatty acid acyltransferase                             | FTS_0176 | htrB         |
| <b>LPS export system</b>                         |                                                            |          |              |
| AFT92846.1                                       | ABC transporter, ATP-binding protein                       | FTS_1039 | yhbG (LptB)  |
| AFT92844.1                                       | hypothetical protein FTS_1037                              | FTS_1037 | (lptC)       |
| AFT93224.1                                       | organic solvent tolerance protein, OstA                    | FTS_1557 | ostA1 (lptD) |
| AFT93138.1                                       | membrane protein of unknown function                       | FTS_1447 | (lptG)       |
| AFT93276.1                                       | lipid exporter (LipidE) family protein                     | FTS_1627 | msbA         |
| <b>Phospholipid transport and biosynthesis</b>   |                                                            |          |              |
| AFT92433.1                                       | membrane protein of unknown function                       | FTS_0515 | ttg2 (mlaC)  |
| AFT92434.1                                       | hypothetical protein FTS_0516                              | FTS_0516 | (mlaD)       |
| AFT92436.1                                       | ABC transporter ATP-binding protein                        | FTS_0518 | (mlaF)       |
| AFT92576.1                                       | hypothetical protein FTS_0696                              | FTS_0696 | (mlaD)       |
| AFT92578.1                                       | ABC transporter membrane protein                           | FTS_0698 | (mlaE)       |
| AFT92106.1                                       | acyltransferase                                            | FTS_0079 | (plsC)       |
| AFT93458.1                                       | putative acyltransferase                                   | FTS_1865 | plsC         |
| AFT92899.1                                       | putative glycerol-3-phosphate acyltransferase PlsX         | FTS_1113 | plsX         |
| <b>Fatty acid metabolism</b>                     |                                                            |          |              |

|            |                                                                               |          |      |
|------------|-------------------------------------------------------------------------------|----------|------|
| AFT92276.1 | acetyl-CoA carboxylase carboxyltransferase subunit alpha                      | FTS_0292 | accA |
| AFT93218.1 | acetyl-CoA carboxylase, biotin carboxylase subunit                            | FTS_1551 | accC |
| AFT93024.1 | acetyl-CoA carboxylase, carboxytransferase subunit beta                       | FTS_1282 | accD |
| AFT92483.1 | acetyl-CoA acetyltransferase                                                  | FTS_0582 | fadA |
| AFT92484.1 | fusion product of 3-hydroxacyl-CoA dehydrogenase and acyl-CoA-binding protein | FTS_0583 | fadB |
| AFT92486.1 | long chain fatty acid CoA ligase                                              | FTS_0585 | fadD |
| AFT92895.1 | acyl carrier protein                                                          | FTS_1109 | acpP |
| AFT92894.1 | beta-ketoacyl-ACP synthase II                                                 | FTS_1108 | fabF |
| AFT92896.1 | 3-oxoacyl-(acyl-carrier-protein) reductase                                    | FTS_1110 | fabG |
| AFT93117.1 | enoyl-ACP reductase I                                                         | FTS_1414 | fabI |
| AFT92571.1 | long chain fatty acid CoA ligase                                              | FTS_0691 | caiC |
| AFT93328.1 | fatty acid desaturase                                                         | FTS_1697 |      |

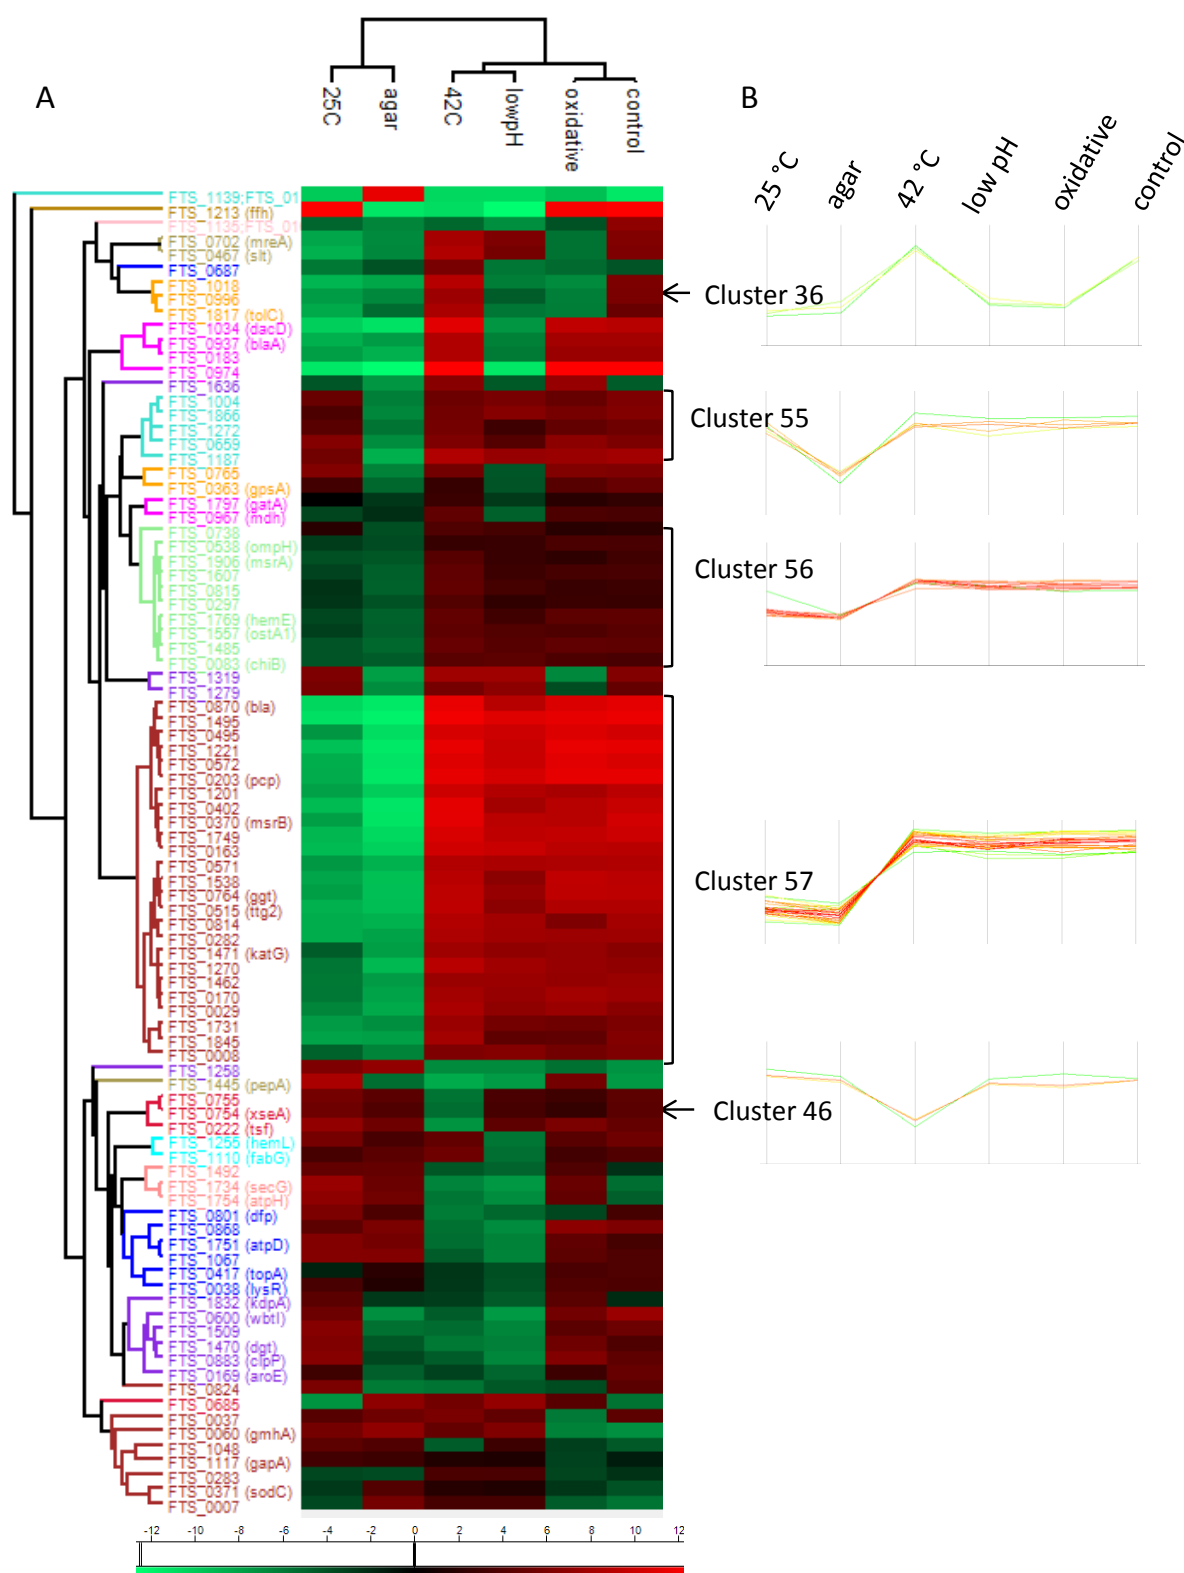

**Supplementary Figure 6-3.** (A) Hierarchical clustering of OMV-enriched, ANOVA-significant proteins. High and low abundances are shown in red and green, respectively. Clusters that are discussed in the text and listed in **Supplementary Table 6-3** are highlighted. (B) Profile plots of these clusters showing distinct behavior with respect to the cultivation conditions.



**Supplementary Table 6-3.** Protein clusters from the relative proteomic comparison of OMV isolated from six different cultivation conditions as depicted in **Supplemental Figure 6-3**. Hierarchical clustering was applied on ANOVA-significant proteins filtered on OMV-enriched proteins.

|                   |                                            |          |        |
|-------------------|--------------------------------------------|----------|--------|
| <b>Cluster 56</b> |                                            |          |        |
| AFT92612.1        | hypothetical protein FTS_0738              | FTS_0738 |        |
| AFT92453.1        | outer membrane protein OmpH                | FTS_0538 | ompH   |
| AFT93482.1        | peptide methionine sulfoxide reductase     | FTS_1906 | msrA   |
| AFT93261.1        | hypothetical protein FTS_1607              | FTS_1607 |        |
| AFT92667.1        | hypothetical protein FTS_0815              | FTS_0815 |        |
| AFT92281.1        | hypothetical protein FTS_0297              | FTS_0297 |        |
| AFT93387.1        | uroporphyrinogen decarboxylase             | FTS_1769 | hemE   |
| AFT93224.1        | organic solvent tolerance protein, OstA    | FTS_1557 | ostA1  |
| AFT93168.1        | chitinase family 18 protein                | FTS_1485 | (chiA) |
| AFT92110.1        | chitinase                                  | FTS_0083 | chiB   |
| <b>Cluster 57</b> |                                            |          |        |
| AFT92715.1        | beta-lactamase class A                     | FTS_0870 | bla    |
| AFT93177.1        | hypothetical protein FTS_1495              | FTS_1495 |        |
| AFT92421.1        | hypothetical protein FTS_0495              | FTS_0495 |        |
| AFT92980.1        | hypothetical protein FTS_1221              | FTS_1221 |        |
| AFT92477.1        | hypothetical protein FTS_0572              | FTS_0572 |        |
| AFT92198.1        | pyrrolidone carboxylate peptidase          | FTS_0203 | pcp    |
| AFT92965.1        | hypothetical protein FTS_1201              | FTS_1201 |        |
| AFT92351.1        | hypothetical protein FTS_0402              | FTS_0402 |        |
| AFT92326.1        | methionine sulfoxide reductase B           | FTS_0370 | msrB   |
| AFT93368.1        | hypothetical protein FTS_1749              | FTS_1749 |        |
| AFT92161.1        | hypothetical protein FTS_0163              | FTS_0163 |        |
| AFT92476.1        | hypothetical protein FTS_0571              | FTS_0571 |        |
| AFT93208.1        | hypothetical protein FTS_1538              | FTS_1538 |        |
| AFT92632.1        | gamma-glutamyltranspeptidase               | FTS_0764 | ggt    |
| AFT92433.1        | membrane protein of unknown function       | FTS_0515 | ttg2   |
| AFT92666.1        | hypothetical protein FTS_0814              | FTS_0814 |        |
| AFT92267.1        | hypothetical protein FTS_0282              | FTS_0282 |        |
| AFT93160.1        | peroxidase/catalase                        | FTS_1471 | katG   |
| AFT93014.1        | hypothetical protein FTS_1270              | FTS_1270 |        |
| AFT93152.1        | hypothetical protein FTS_1462              | FTS_1462 |        |
| AFT92167.1        | hypothetical protein FTS_0170              | FTS_0170 |        |
| AFT92071.1        | histidine acid phosphatase                 | FTS_0029 |        |
| AFT93352.1        | hypothetical protein FTS_1731              | FTS_1731 |        |
| AFT93439.1        | hypothetical protein FTS_1845              | FTS_1845 |        |
| AFT92056.1        | outer membrane protein of unknown function | FTS_0008 |        |
| <b>Cluster 55</b> |                                            |          |        |
| AFT92817.1        | radical SAM superfamily protein            | FTS_1004 |        |
| AFT93459.1        | competence protein                         | FTS_1866 |        |

|            |                               |          |
|------------|-------------------------------|----------|
| AFT93015.1 | hypothetical protein FTS_1272 | FTS_1272 |
| AFT92546.1 | hypothetical protein FTS_0659 | FTS_0659 |
| AFT92956.1 | hypothetical protein FTS_1187 | FTS_1187 |

**Cluster 46**

|            |                                        |          |        |
|------------|----------------------------------------|----------|--------|
| AFT92624.1 | hypothetical protein FTS_0755          | FTS_0755 | (xseB) |
| AFT92623.1 | exodeoxyribonuclease VII large subunit | FTS_0754 | xseA   |
| AFT92212.1 | elongation factor Ts                   | FTS_0222 | tsf    |

**Cluster 36**

|            |                                       |                  |
|------------|---------------------------------------|------------------|
| AFT92827.1 | hypothetical protein FTS_1018         | FTS_1018         |
| AFT92811.1 | histidine acid phosphatase            | FTS_0996         |
| AFT93426.1 | outer membrane protein tolC precursor | FTS_1817    tolC |
